# Supplementary material for: Association between use of a local event information app and well-being among adults in Japan
Source: Research Square preprint supplement (doi:10.21203/rs.3.rs-8403632/v1), 2026-01-05
Supplement: Supplementary file 1 [file 401f2957a69d40672ad2828a.docx]

| Supplementary table1 Differences in well-being among app users | | | |  |
| --- | --- | --- | --- | --- |
|  |  | Active Users | Inactive Users | Total |
| Happiness, mean (SD) |  |  |  |  |
|  | Total | 0.474 (1.775) | -0.141 (1.494) | -0.113(1.511) |
|  | Younger adults | 1.000 (1.764) | -0.178 (1.610) | -0.133 (1.628) |
|  | Middle adulthood | -0.111 (1.691) | -0.076 (1.269) | -0.078 (1.290) |
| Life satisfaction, mean (SD) |  |  |  |  |
|  | Total | 0.105 (1.560) | -0.270 (1.638) | -0.252 (1.634) |
|  | Younger adults | 0.300 (1.252) | -0.277 (1.679) | -0.255 (1.667) |
|  | Middle adulthood | -0.111 (1.900) | -0.257 (1.568) | -0.248 (1.582) |
| Abbreviations: SD, standard deviation. | | | |  |

| Supplementary table2 Differences in characteristics among app users | | |  |  | |  |  | |
| --- | --- | --- | --- | --- | --- | --- | --- | --- |
|  |  |  | Active Users | Inactive Users | | Total | | Test | |
|  |  |  | n=19 (4.6%) | n=397 (95.4%) | n=416 (100.0%) | | |  | |
|  | Prior health behaviors |  |  |  | |  | |  | |
|  |  | Walking, mean (SD) | 0.000 (0.667) | 0.003 (0.787) | | 0.002 (0.781) | | 0.989 | |
|  |  | Frequency of going out, mean (SD) | 0.211 (0.976) | -0.310 (1.116) | | -0.286 (1.114) | | 0.047 | |
|  | Prior social well-being |  |  |  | |  | |  | |
|  |  | Participation in hobby group, mean (SD) | 0.053 (0.970) | 0.053 (0.788) | | 0.053 (0.796) | | 0.999 | |
|  |  | Participation in sports group, mean (SD) | 0.053 (0.621) | 0.106 (0.706) | | 0.103 (0.702) | | 0.748 | |
|  |  | Participation in parenting group, mean (SD) | 0.263 (1.147) | 0.013 (0.712) | | 0.024 (0.738) | | 0.148 | |
|  |  | Participation in volunteer groups, mean (SD) | 0.368 (1.342) | 0.108 (0.704) | | 0.120 (0.744) | | 0.137 | |
|  |  | Frequency of meeting friends, mean (SD) | -0.526 (1.645) | 0.081 (1.388) | | 0.053 (1.405) | | 0.066 | |
|  |  | Frequency of meeting friends by video, mean (SD) | 0.368 (1.116) | -0.040 (1.388) | | -0.022 (1.379) | | 0.207 | |
|  |  | Frequency of meeting friends by phone, mean (SD) | -0.053 (1.311) | 0.076 (1.277) | | 0.070 (1.277) | | 0.670 | |
|  |  | Frequency of meeting friends by letter, mean (SD) | 0.105 (1.100) | -0.003 (1.346) | | 0.002 (1.334) | | 0.731 | |
|  |  | Number of friends seen within a month, mean (SD) | -0.316 (1.204) | 0.018 (1.272) | | 0.002 (1.270) | | 0.264 | |
|  |  | Number of friends seen within a month by SNS, mean (SD) | -0.263 (1.046) | 0.010 (1.030) | | -0.002 (1.031) | | 0.260 | |
|  |  | Number of new friends met, mean (SD) | -0.053 (0.621) | -0.033 (1.106) | | -0.034 (1.088) | | 0.938 | |
|  | Prior cognitive social capital |  |  |  | |  | |  | |
|  |  | Trust, mean (SD) | 0.263 (0.806) | 0.000 (0.595) | | 0.012 (0.607) | | 0.065 | |
|  |  | Norms of reciprocity, mean (SD) | 0.316 (1.057) | 0.025 (0.752) | | 0.038 (0.769) | | 0.108 | |
|  |  | Community attachment, mean (SD) | 0.316 (0.946) | 0.010 (0.647) | | 0.024 (0.665) | | 0.050 | |
|  | Prior the neighborhood-built environment | |  |  | |  |  | |
|  |  | Frequency of park visits, mean (SD) | 0.000 (1.247) | 0.030 (1.063) | | 0.029 (1.071) | | 0.904 | |
|  |  | Number of comfortable places, mean (SD) | 0.053 (0.911) | -0.028 (0.733) | | -0.024 (0.741) | | 0.645 | |
| Abbreviations: SD, standard deviation. | | |  |  | |  |  | |

| Supplementary table3 Differences in characteristics of app users by younger adults | | |  |  |  |  |
| --- | --- | --- | --- | --- | --- | --- |
|  |  |  | Active Users | Inactive Users | Total | Test |
|  |  |  | n=10 (3.8%) | n=253 (96.2%) | n=263 (100.0%) |  |
| Younger adults | |  |  |  |  |  |
|  | Prior health behaviors |  |  |  |  |  |
|  |  | Walking, mean (SD) | -0.100 (0.738) | 0.020 (0.779) | 0.015 (0.776) | 0.633 |
|  |  | Frequency of going out, mean (SD) | 0.000 (0.471) | -0.285 (1.137) | -0.274 (1.119) | 0.431 |
|  | Prior social well-being |  |  |  |  |  |
|  |  | Participation in hobby group, mean (SD) | -0.100 (1.101) | 0.012 (0.814) | 0.008 (0.824) | 0.675 |
|  |  | Participation in sports group, mean (SD) | 0.100 (0.568) | 0.134 (0.641) | 0.133 (0.637) | 0.867 |
|  |  | Participation in parenting group, mean (SD) | 0.800 (0.919) | 0.008 (0.812) | 0.038 (0.828) | 0.003 |
|  |  | Participation in volunteer groups, mean (SD) | 0.500 (1.780) | 0.130 (0.742) | 0.144 (0.802) | 0.153 |
|  |  | Frequency of meeting friends, mean (SD) | -0.400 (1.075) | 0.024 (1.434) | 0.008 (1.422) | 0.356 |
|  |  | Frequency of meeting friends by video, mean (SD) | 0.500 (1.080) | -0.079 (1.337) | -0.057 (1.331) | 0.178 |
|  |  | Frequency of meeting friends by phone, mean (SD) | 0.000 (1.700) | 0.043 (1.295) | 0.042 (1.308) | 0.918 |
|  |  | Frequency of meeting friends by letter, mean (SD) | -0.100 (0.994) | -0.067 (1.389) | -0.068 (1.374) | 0.941 |
|  |  | Number of friends seen within a month, mean (SD) | -0.700 (1.059) | -0.032 (1.244) | -0.057 (1.242) | 0.095 |
|  |  | Number of friends seen within a month by SNS, mean (SD) | -0.600 (0.843) | 0.032 (1.046) | 0.008 (1.045) | 0.061 |
|  |  | Number of new friends met, mean (SD) | 0.100 (0.738) | -0.055 (1.090) | -0.049 (1.078) | 0.656 |
|  | Prior cognitive social capital | |  |  |  |  |
|  |  | Trust, mean (SD) | 0.200 (0.422) | 0.036 (0.606) | 0.042 (0.601) | 0.397 |
|  |  | Norms of reciprocity, mean (SD) | 0.100 (0.568) | 0.055 (0.670) | 0.057 (0.666) | 0.836 |
|  |  | Community attachment, mean (SD) | 0.400 (0.966) | -0.020 (0.663) | -0.004 (0.680) | 0.055 |
|  | Prior the neighborhood-built environment | |  |  |  |  |
|  |  | Frequency of park visits, mean (SD) | -0.200 (1.398) | 0.020 (1.100) | 0.011 (1.110) | 0.540 |
|  |  | Number of comfortable places, mean (SD) | -0.200 (0.422) | -0.063 (0.699) | -0.068 (0.690) | 0.540 |
| Abbreviations: SD, standard deviation. | | |  |  |  |  |

| Supplementary table4 Differences in characteristics of app users by middle-aged adults | | | | | |  | | |  | | |  | | |
| --- | --- | --- | --- | --- | --- | --- | --- | --- | --- | --- | --- | --- | --- | --- |
|  |  |  | | Active Users | Inactive Users | | | Total | | | Test | | |
|  |  |  | n=9 (5.9%) | | | | n=144 (94.1%) | | | n=153 (100.0%) | | |  | | |
| Middle-aged adults | |  |  | | | |  | | |  | | |  | | |
|  | Prior health behaviors |  |  | | | |  | | |  | | |  | | |
|  |  | Walking, mean (SD) | 0.111 (0.601) | | | | -0.028 (0.802) | | | -0.020 (0.790) | | | 0.611 | | |
|  |  | Frequency of going out, mean (SD) | 0.444 (1.333) | | | | -0.354 (1.080) | | | -0.307 (1.108) | | | 0.035 | | |
|  | Prior social well-being |  |  | | | |  | | |  | | |  | | |
|  |  | Participation in hobby group, mean (SD) | 0.222 (0.833) | | | | 0.125 (0.737) | | | 0.131 (0.741) | | | 0.704 | | |
|  |  | Participation in sports group, mean (SD) | 0.000 (0.707) | | | | 0.056 (0.809) | | | 0.052 (0.801) | | | 0.841 | | |
|  |  | Participation in parenting group, mean (SD) | -0.333 (1.118) | | | | 0.021 (0.494) | | | 0.000 (0.550) | | | 0.061 | | |
|  |  | Participation in volunteer groups, mean (SD) | 0.222 (0.667) | | | | 0.069 (0.633) | | | 0.078 (0.634) | | | 0.485 | | |
|  |  | Frequency of meeting friends, mean (SD) | -0.667 (2.179) | | | | 0.181 (1.304) | | | 0.131 (1.375) | | | 0.073 | | |
|  |  | Frequency of meeting friends by video, mean (SD) | 0.222 (1.202) | | | | 0.028 (1.477) | | | 0.039 (1.459) | | | 0.700 | | |
|  |  | Frequency of meeting friends by phone, mean (SD) | -0.111 (0.782) | | | | 0.132 (1.247) | | | 0.118 (1.224) | | | 0.565 | | |
|  |  | Frequency of meeting friends by letter, mean (SD) | 0.333 (1.225) | | | | 0.111 (1.263) | | | 0.124 (1.258) | | | 0.609 | | |
|  |  | Number of friends seen within a month, mean (SD) | 0.111 (1.269) | | | | 0.104 (1.321) | | | 0.105 (1.314) | | | 0.988 | | |
|  |  | Number of friends seen within a month by SNS, mean (SD) | 0.111 (1.167) | | | | -0.028 (1.003) | | | -0.020 (1.010) | | | 0.690 | | |
|  |  | Number of new friends met, mean (SD) | -0.222 (0.441) | | | | 0.007 (1.137) | | | -0.007 (1.109) | | | 0.549 | | |
|  | Prior cognitive social capital |  |  | | | |  | | |  | | |  | | |
|  |  | Trust, mean (SD) | 0.333 (1.118) | | | | -0.062 (0.570) | | | -0.039 (0.616) | | | 0.061 | | |
|  |  | Norms of reciprocity, mean (SD) | 0.556 (1.424) | | | | -0.028 (0.877) | | | 0.007 (0.921) | | | 0.065 | | |
|  |  | Community attachment, mean (SD) | 0.222 (0.972) | | | | 0.062 (0.617) | | | 0.072 (0.640) | | | 0.469 | | |
|  | Prior the neighborhood-built environment | |  | | | |  | | |  | | |  | | |
|  |  | Frequency of park visits, mean (SD) | 0.222 (1.093) | | | | 0.049 (0.999) | | | 0.059 (1.002) | | | 0.616 | | |
|  |  | Number of comfortable places, mean (SD) | 0.333 (1.225) | | | | 0.035 (0.788) | | | 0.052 (0.817) | | | 0.289 | | |
| Abbreviations: SD, standard deviation. | |  |  | | | |  | | |  | | |  | | |
